# Supplementary material for: Phylogenomics With Hyb-Seq Unravels Korean Hosta Evolution
Source: Front Plant Sci. 2021 Jul 8;12:645735. doi: 10.3389/fpls.2021.645735 (PMC8296909; doi:10.3389/fpls.2021.645735)
Supplement: Supplementary file 5 [file Table_1.XLSX]

## Sheet: S1_Table
Supplementary Table 1. The information of samples used in this study and statistics of target enrichment of 293 nuclear genes and chloroplast genome skimming
Species	Species_code	Locality	Collection Number	Herbarium	286 Nuclear genes									Chloroplast genome
					Number of filtered reads	Number of reads mapped to target genes	Percentage (%) of reads mapped	Length of Aligned seqs (bp)	mean coverage	General error rate	% of Gap	Genes WithSeqs	Paralog Warnings	Number of filtered reads	Number of reads mapped to the reference	Percentage (%) of reads mapped	Length of Aligned seqs (bp)
H. capitata	Hoscap_15270	Near Manhangjae, Gohan-ri, Gohan-eup, Jeongseon-gun, Gangwon-do	LeeJD et al. 15270	NIBR	2604509	1905293	73.1536	383218	351.58	0.0288	9.68655	275	6	1986144	103888	2.61532	156418
H. capitata	Hoscap_15285	Baekcheon Valley, Daehyeon-ri, Seokpo-myeon, Bonghwa-gun, Gyeongsangbuk-do	LeeJD et al. 15285	NIBR	4921671	4103111	83.3683	462643	800.68	0.0292	2.31428	273	11	2762081	113683	2.05792	156419
H. capitata	Hoscap_15290	San 264, Eochi-ri, Jinsang-myeon, Gwangyang-si, Jeollanam-do	LeeJD et al. 15290	NIBR	5304303	4309572	81.2467	442173	814.32	0.0289	3.55355	274	9	2734713	31399	0.574082	156421
H. capitata	Hoscap_110630	Jirisan National Park, Jeongnyeongchi, Deokdong-ri, Sannae-myeon, Namwon-si, Jeollabuk-do	110630	NIBR	6279031	4680154	74.5362	442747	872.43	0.0296	2.74434	275	11	2514779	133449	2.65329	156425
H. capitata 'Albiflora'	Hoscap72	Hantaek botanical garden (cultivated), Baegam-myeon, Cheoin-gu, Yongin-si, Gyeonggi-do	72	NIBR	21071105	14298230	67.857	471676	2688.39	0.0283	3.7	275	14	4297415	97265	2.26334	156641
H. capitata	Hoscap75	Hantaek botanical garden (cultivated), Baegam-myeon, Cheoin-gu, Yongin-si, Gyeonggi-do	75	NIBR	11032274	7336096	66.4967	474719	1379.98	0.0286	3.08	275	16	4459489	113627	2.54798	156374
H. clausa	Hoscla_307087	Jeodong, Gangneung, Gangwon-do	-	NIBR	5234603	3854883	73.6423	466719	727.9	0.0281	1.2917	276	7	2914700	180845	3.10229	156622
H. clausa	Hoscla_464947	Taebaeksan, Sodo-dong, Taebaek-si, Gangwon-do	-	NIBR	4147571	2945080	71.0073	470052	557.46	0.0282	1.66873	277	10	2378397	322295	6.77547	156624
H. clausa	Hoscla_300097	Eomso-ri, Seorak-myeon, Gapyeong-gun, Gyeonggi-do	-	NIBR	5570561	4104576	73.6834	420147	771.34	0.0281	3.8937	275	7	3251539	368433	5.66552	156624
H. clausa	Hoscla_15484	Soyosan, Sangbongam-dong, Dongducheon-si, Gyeonggi-do	LeeJD et al. 15484	NIBR	5297461	4206044	79.3974	468049	789.08	0.0285	1.17802	277	9	3161927	145526	2.30122	156574
H. clausa	Hoscla_138461	Hantan River, Jung-ri, Gwanin-myeon, Pocheon-si, Gyeonggi-do	-	NIBR	4380338	3175127	72.4859	476900	607.04	0.0281	0.855547	278	12	2538090	200008	3.94013	156622
H. clausa	Hoscla_122790	Baegunsan, Dopyeong-ri, Idong-myeon, Pocheon-si, Gyeonggi-do	-	NIBR	4452342	3298879	74.0931	457216	622.47	0.0275	2.12073	275	8	2664299	74553	1.39911	156620
H. clausa 'Chameleon'	Hoscla_13	Hantaek botanical garden (cultivated), Baegam-myeon, Cheoin-gu, Yongin-si, Gyeonggi-do	13	NIBR	6426673	4884006	75.9959	480309	926.03	0.0291	1.5014	277	10	2193545	245659	5.59959	156653
H. clausa 'Goesan Golden Lightening'	Hoscla_14	Hantaek botanical garden (cultivated), Baegam-myeon, Cheoin-gu, Yongin-si, Gyeonggi-do	14	NIBR	5265491	4084248	77.5663	471046	773.89	0.0289	2.83151	277	11	1925467	124075	3.22195	156625
H. clausa 'Goesan Green Lightening'	Hoscla_15	Hantaek botanical garden (cultivated), Baegam-myeon, Cheoin-gu, Yongin-si, Gyeonggi-do	15	NIBR	5756387	4399327	76.4251	477295	829.15	0.0286	1.97901	276	12	1758064	162546	4.62287	156571
H. clausa 'Golden Wonder'	Hoscla_16	Hantaek botanical garden (cultivated), Baegam-myeon, Cheoin-gu, Yongin-si, Gyeonggi-do	16	NIBR	6364808	4995203	78.4816	477238	950.79	0.0287	1.71567	275	8	2481061	356791	7.19029	156571
H. clausa	Hoscla_0828	Daeamsan, Inje-gun, Kangwon-do	celim0828	NIBR	4140614	3339263	80.6466	391791	635.53	0.0286	19.2884	278	12	1621974	100471	3.09718	156625
H. clausa	Hoscla_15327	Dosan-myeon, Andong, Gyeongsangbuk-do	LeeJD et al. 15327	NIBR	4224011	3461445	81.9469	477161	665.43	0.0287	1.70348	275	11	2278464	59775	1.31174	156459
H. clausa	Hoscla_15320	Deokgye-ri, Hyeonseo-myeon, Cheongsong-gun, Gyeongsangbuk-do	LeeJD et al. 15320	NIBR	4224000	3501607	82.8979	464352	673.82	0.029	1.76748	275	9	2173872	14003	0.322075	155415
H. clausa	Hoscla_15299	Donggang, Unchi-ri, Sindong-eup, Jeongseon-gun, Gangwon-do	LeeJD et al. 15299	NIBR	4004691	2991540	74.7009	460666	551.98	0.0289	2.62364	279	8	2198687	144230	3.27991	156647
H. clausa	Hoscla_0309_1	Riverside of Hantan River, Gunnam-myeon, Yeoncheon-gun, Gyeonggi-do	GH1_0309.1	NIBR	5284291	3326783	62.9561	464383	584.57	0.0296	1.98266	279	9	2531341	88699	1.75202	156621
H. jonesii	Hosjon_15354	San 128-1, Wangjosan, Jeogu-ri, Nambu-myeon, Geoje-si, Gyeongsangnam-do	LeeJD et al. 15354	NIBR	4762079	3847935	80.8037	472061	737.49	0.0279	2.82511	277	8	2495028	65108	1.30475	156599
H. jonesii	Hosjon_15337	Roadside near Namhae Pyeonbaek Forest Resort, Bonghwa-ri, Samdong-myeon, Namhae-gun, Gyeongsangnam-do	LeeJD et al. 15337	NIBR	4222387	3279266	77.6638	422966	620.82	0.0285	3.79099	279	7	2003732	36478	0.910251	156723
H. jonesii	Hosjon_15378_1	San 334, Yanga-ri, Sangju-myeon, Namhae-gun, Gyeongsangnam-do	LeeJD et al. 15378_1	NIBR	5952659	4337589	72.8681	429188	808.77	0.029	2.92812	279	8	3356717	199862	2.97705	156588
H. jonesii	Hosjon_544677	Geogeumdo, Geumsan-myeon, Kohung-gun, Jeollanam-do	-	NIBR	4982461	3408184	68.4036	424744	642.26	0.0285	3.83274	278	8	2633484	71425	1.35609	156671
H. jonesii	Hosjon_360282	Jindo, Gogun-myeon, Jindo-gun, Jellanam-do	-	NIBR	4526230	3622115	80.025	468648	677.51	0.0277	2.02899	275	11	2514819	118030	2.34669	156612
H. jonesii	Hosjon_15419	79 Yongho-ri, Imhoe-myeon, Jindo, Jeollanam-do	LeeJD et al. 15419	NIBR	4456161	3648420	81.8736	473193	715.12	0.0282	1.57424	276	11	2604250	91706	1.7607	156631
H. minor	Hosmin_15252	San 73-1 Beopgi-ri, Dong-myeon, Yangsan, Gyeongsangnam-do	LeeJD et al. 15252	NIBR	4979924	3882332	77.9597	456014	743.49	0.027	1.32066	279	8	1755702	35988	1.02489	156389
H. minor	Hosmin_15343	Cheongnyangsan, Bukgok-ri, Myeongho-myeon, Bonghwa-gun, Gyeongsangbuk-do	LeeJD et al. 15343	NIBR	3999070	2796005	69.9164	455897	539.65	0.0262	2.40236	276	8	2295736	13049	0.284201	155666
H. minor	Hosmin_15305_3	Kaejwa-san, San 180-125, Jangjeon-ri, Cheolma-myeon, Gijang-gun, Busan	LeeJD et al. 15305-3	NIBR	6581848	5387995	81.8614	359467	37.25	0.0269	10.2894	281	7	2553064	12871	0.25207	154970
H. minor	Hosmin_15306	Gamjihaebyeon-gil, 64 Jung-ri, Dongsam-dong, Yeongdo-gu, Busan	LeeJD et al. 15306	NIBR	4775354	3902042	81.7121	446262	768.5	0.0265	2.77847	276	9	3159434	59780	0.946056	156558
H. minor	Hosmin_15287	Daean-dong, Buk-gu, Ulsan	LeeJD et al. 15287	NIBR	4452138	3162046	71.0231	466093	609.84	0.0258	1.81991	277	8	2392648	56497	1.18064	156646
H. minor	Hosta_0159_2	Joyakdo, Yaksan-myeon, Wando-gun, Jeollanam-do	celim0159.2	NIBR	5977599	4098890	68.5708	457551	768.78	0.0263	1.60869	276	6	2308293	75145	1.62772	156677
H. minor	Hosmin_15222	San 137, Hanboksan, Namdong-ri, Imhoe-myeon, Jindo-gun, Jeollanam-do	LeeJD et al. 15222	NIBR	4288933	3139663	73.2038	392682	578.7	0.0269	15.9985	278	11	2065377	62548	1.5142	156675
H. minor	Hosmin_15257	2986-1 Ara-1-dong, Jeju-si, Jeju-do	LeeJD et al. 15257	NIBR	4423170	3531937	79.8508	398514	664.06	0.0264	6.03333	278	4	2527685	60822	1.20312	156672
H. minor	Hosmin_15225	240 Bunji-ri, Yeonpung-myeon, Goesan, Chungcheongbuk-do	LeeJD et al. 15225	NIBR	3765650	3010819	79.9548	470737	576.78	0.0261	3.62244	278	10	2270237	30527	0.672331	156646
H. minor f. alba	Hosmin_15261	2986-1 Ara-1-dong, Jeju-si, Jeju-do	LeeJD et al. 15261	NIBR	3817524	3106804	81.3827	474396	594.19	0.0261	1.65471	277	9	2457283	38765	0.788778	156509
H. minor f. alba	Hosmin_15263	2986-1 Ara-1-dong, Jeju-si, Jeju-do	LeeJD et al. 15263	NIBR	5324094	3861794	72.5343	457530	743.54	0.0257	1.38649	278	8	2984511	66472	1.11362	156675
H. plantaginea	Hospla_15455	San 17-2, Jangsa-dong, Sokcho-si, Kangwon-do	LeeJD et al. 15455	NIBR	3474614	2380959	68.5244	473811	433.59	0.0327	1.84276	276	14	1738519	32768	0.942411	156468
H. plantaginea	Hospla_15487	Galhyeon-dong, Gwacheon-si, Gyeonggi-do	LeeJD et al. 15487	NIBR	2333875	1742999	74.6826	475444	325.19	0.0322	2.12592	278	13	1823594	66028	1.81038	156428
H. ventricosa	H_ventrcosa_1343	Hantaek botanical garden (cultivated), Baegam-myeon, Cheoin-gu, Yongin-si, Gyeonggi-do	1343	NIBR	2569328	1772428	68.9841	459050	338.31	0.0297	6.28	278	12	4819784	54070	1.12183	156500
H. ventricosa	H_ventricosa_2018	Hantaek botanical garden (cultivated), Baegam-myeon, Cheoin-gu, Yongin-si, Gyeonggi-do	2018	NIBR	3201510	2290371	71.5403	467993	441.19	0.0277	4.45	275	7	1816753	14184	0.780734	155998
H. venusta	Hosta_s_n__5	Goepyeongee Oreum, Gyorae-ri, Jochon-eup, Jeju-si, Jeju-do	s.n._5	NIBR	6451172	4615314	71.5423	431695	838.86	0.0277	3.83762	278	6	2711689	165063	3.04355	156677
H. venusta	Hosta_s_n__6	Goepyeongee Oreum, Gyorae-ri, Jochon-eup, Jeju-si, Jeju-do	s.n._6	NIBR	4390134	3604945	82.1147	475689	689.15	0.0267	1.66599	278	10	2106810	24461	0.580522	156591
H. venusta	Hosta_s_n__7_2	Goepyeongee Oreum, Gyorae-ri, Jochon-eup, Jeju-si, Jeju-do	s.n._7.2	NIBR	4426963	2695096	60.8791	414476	499.26	0.0263	5.11256	280	7	2235632	69417	1.55251	156672
H. venusta	Hosven_15310	San 1-1, Donghong-dong, Seogwipo-si, Jeju-do	LeeJD et al. 15310	NIBR	4506052	3193933	70.881	478307	577.55	0.0275	1.1704	276	12	2114923	123261	2.91408	156677
H. venusta	Hosven_15311	San 183-6, Kwangryong-ri, Aewol-eup, Jeju-si, Jeju-do	LeeJD et al. 15311	NIBR	5318843	4328165	81.3742	478827	827.08	0.024	1.41606	276	8	2539419	140861	2.77349	156677
H. venusta 'All Gold'	Hosven_32	Hantaek botanical garden (cultivated), Baegam-myeon, Cheoin-gu, Yongin-si, Gyeonggi-do	32	NIBR	3141255	2140047	68.1271	475599	389.07	0.0267	1.20667	277	11	873342	55805	3.19491	156677
H. venusta 'Golden Eruption'	Hosven_33	Hantaek botanical garden (cultivated), Baegam-myeon, Cheoin-gu, Yongin-si, Gyeonggi-do	33	NIBR	4572249	3545815	77.5508	470437	657.54	0.0259	1.91134	276	8	2307198	160131	3.47025	156677
H. venusta 'Sudden Eruption'	Hosven_34	Hantaek botanical garden (cultivated), Baegam-myeon, Cheoin-gu, Yongin-si, Gyeonggi-do	34	NIBR	4332139	3249810	75.0163	425772	605.95	0.0273	3.67639	279	8	2418655	219401	4.5356	156672
H. yingeri	Hosyin_s_n_	Gageodo, Heuksan-myon, Sinan-gun, Jeollanam-do	s.n.	NIBR	3262476	2467867	75.644	457323	470.21	0.033	2.76872	276	8	2766846	201276	3.63728	156756
H. yingeri	Hosyin_16285	Hongdo-ri, Heuksan-myon, Sinan-gun, Jeollanam-do	LeeJD et al. 16285	NIBR	3269477	1910839	58.4448	365267	369.97	0.0331	8.46495	275	6	2744033	11053	0.201401	154648
H. yingeri	Hosyin_0918	Heuksando, Heuksan-myon, Sinan-gun, Jeollanam-do	celim0918	NIBR	4303444	2718451	63.1692	380648	531.51	0.0324	6.20249	274	8	1825986	21938	0.600717	156199
H. yingeri	Hosyin_0919	Heuksando, Heuksan-myon, Sinan-gun, Jeollanam-do	celim0919	NIBR	3791871	2533706	66.8194	393821	492.1	0.0329	5.22198	273	7	3295131	41356	0.627532	155720
H. yingeri	Hosyin_0616_1	Between Sa-ri and Seosanmeori, Heuksando, Heuksan-myon, Sinan-gun, Jeollanam-do	GH1_0616.1	NIBR	3411468	2792767	81.8641	382567	549.93	0.0332	6.95898	275	7	3317121	296870	4.47481	156498
				AVERAGE =	4.98238e+06	3.69469e+06	74.5337	447876	680.674	0.0283764	3.66706	276.618	9.14545	2.52108e+06	108622	2.25124	156455
								359467	2688.39
