# Supplementary material for: Phylogenomics With Hyb-Seq Unravels Korean Hosta Evolution
Source: Front Plant Sci. 2021 Jul 8;12:645735. doi: 10.3389/fpls.2021.645735 (PMC8296909; doi:10.3389/fpls.2021.645735)
Supplement: Supplementary file 6 [file Table_2.XLSX]

## Sheet: Sheet1
Table S2. The species information used in divergence time estimate
Subfamily	Species	Accession No.
Agavoideae	Agave attenuata	NC_032696
Agavoideae	Anemarrhena asphodeloides	NC_032698
Agavoideae	Behnia reticulata	KX931450
Agavoideae	Beschoneria septentrionalis	KX931451
Agavoideae	Camassia scilloides	NC_032700
Agavoideae	Chlorogalum pomeridianum	NC_032701
Agavoideae	Echeandia sp.	KX931455
Agavoideae	Hesperaloe campanulata	NC_032702
Agavoideae	Hesperaloe parviflora	NC_032703
Agavoideae	Hesperocallis undulata	NC_032704
Agavoideae	Hesperoyucca whipplei	NC_032705
Agavoideae	Hosta capitata	NC045519
Agavoideae	Hosta capitata (Hoscap_15285)	This study
Agavoideae	Hosta clausa	MK732315
Agavoideae	Hosta clausa (Hoscla_15320)	This study
Agavoideae	Hosta clausa (Hoscla_15484)	This study
Agavoideae	Hosta jonesii	MK732318
Agavoideae	Hosta jonesii (Hosjon_15419)	This study
Agavoideae	Hosta minor	MK732316
Agavoideae	Hosta minor (Hosmin_15287)	This study
Agavoideae	Hosta plantaginea (Hospla_15455)	This study
Agavoideae	Hosta plantaginea (Hospla_15487)	This study
Agavoideae	Hosta ventricosa (Hventricosa_1343)	This study
Agavoideae	Hosta venusta	MK732314
Agavoideae	Hosta venusta (Hosven_15311)	This study
Agavoideae	Hosta yingeri	NC039976
Agavoideae	Hosta yingeri (Hosta s. n.)	This study
Agavoideae	Manfreda virginica	KX931461
Agavoideae	Polianthes sp.	KX931464
Agavoideae	Schoenolirion croceum	NC_032710
Agavoideae	Yucca brevifolia	NC_032711
Agavoideae	Yucca filamentosa	NC_032712
Agavoideae	Yucca queretaroensis	NC_032713
Agavoideae	Yucca schidigera	NC_032714
Asparagoideae	Asparagus officinalis	NC_034777
Asparagoideae	Asparagus racemosus	NC_047472
Nolinoideae	Liriope spicata	NC_042227
Nolinoideae	Nolina atopocarpa	NC_032708
Scilloideae	Albuca cf. kirkii	NC_032697
Scilloideae	Oziroe biflora	NC_032709
